# Supplementary material
Source: PubMed Central journal article supplement (PMC7065912)
Supplement: NIHMS1068216-supplement-1.pdf [file NIHMS1068216-supplement-1.pdf]

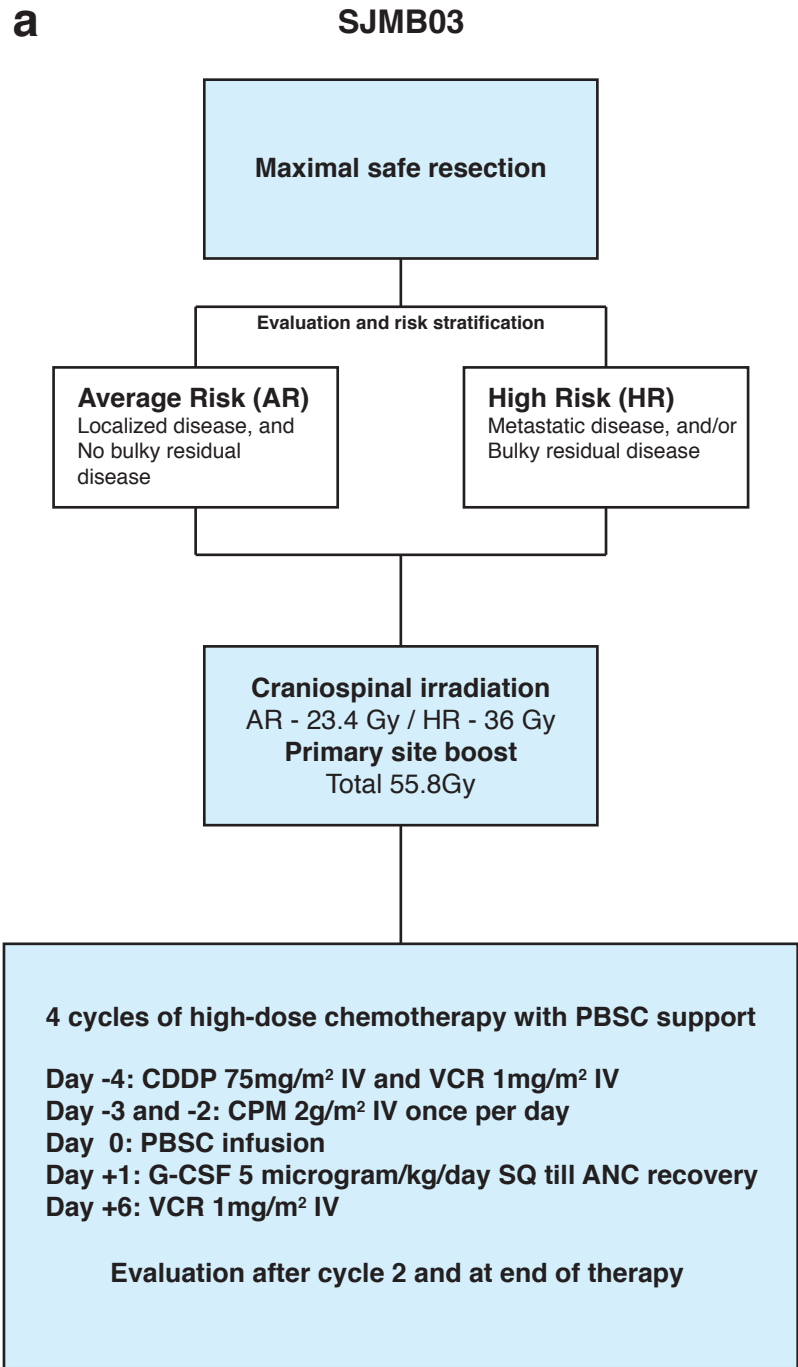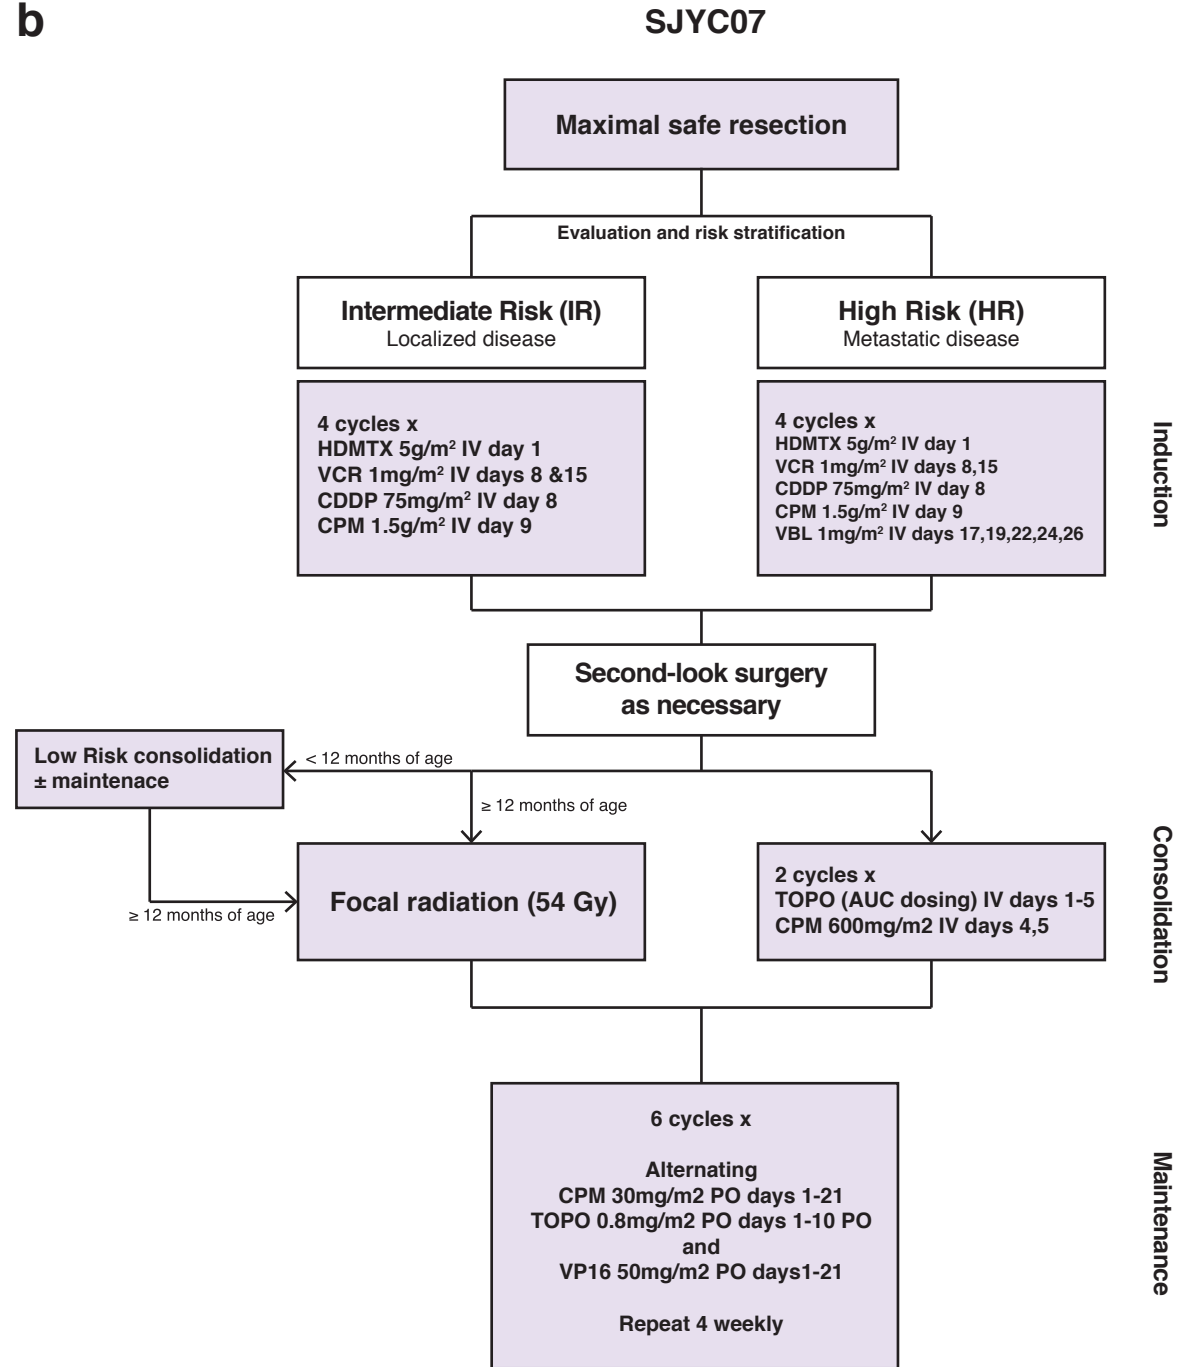

ANC, absolute neutrophil count; AUC, area under curve; CDDP, cisplatin; CPM, cyclophosphamide; G-CSF, granulocyte-colony stimulating factor; HDMTX, high-dose methotrexate; IV, intravenous; PBSC, peripheral blood stem cell; PO, oral; SQ, subcutaneous; TOPO, topotecan; VBL, vinblastine; VCR, vincristine; VP16, etoposide
