# Supplementary material
Source: PubMed Central journal article supplement (PMC7065912)
Supplement: NIHMS1068216-supplement-7.pdf [file NIHMS1068216-supplement-7.pdf]

a

## SJPB15

Male, 1.42 years, M<sup>0</sup>, histology: pineoblastoma  
 SJYC07 therapy with focal radiation  
 Developed PD and DOD 0.59 year after Dx

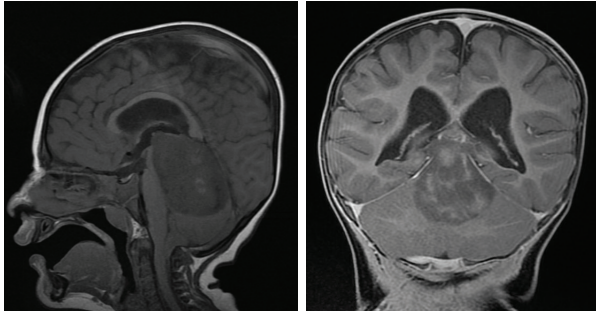

Tumor only panel sequencing  
*DICER1*  
**c.2771T>G p.L924\***  
**c.5425G>A p.G1809R**

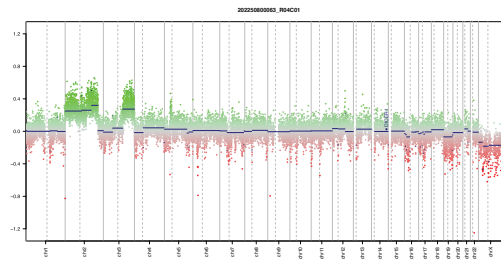

## SJPB16

Male, 4.73 years, M<sup>0</sup>, histology: pineal anlage tumor  
 SJMB03-like therapy with CSI  
 Developed PD and DOD 1.30 years after Dx

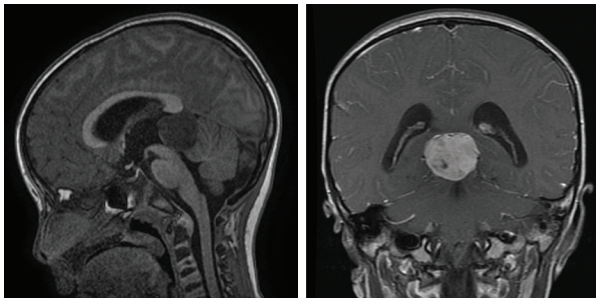

Paired tumor/germline WES  
*DICER1*  
**c.4300del p.E1434fs (somatic)**  
**c.5113G>A p. E1705K (somatic)**

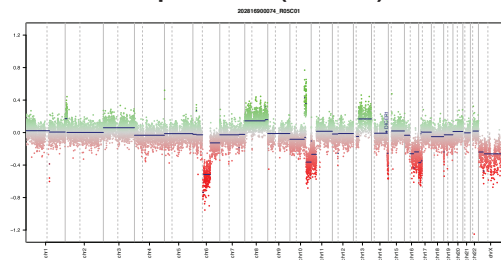

b

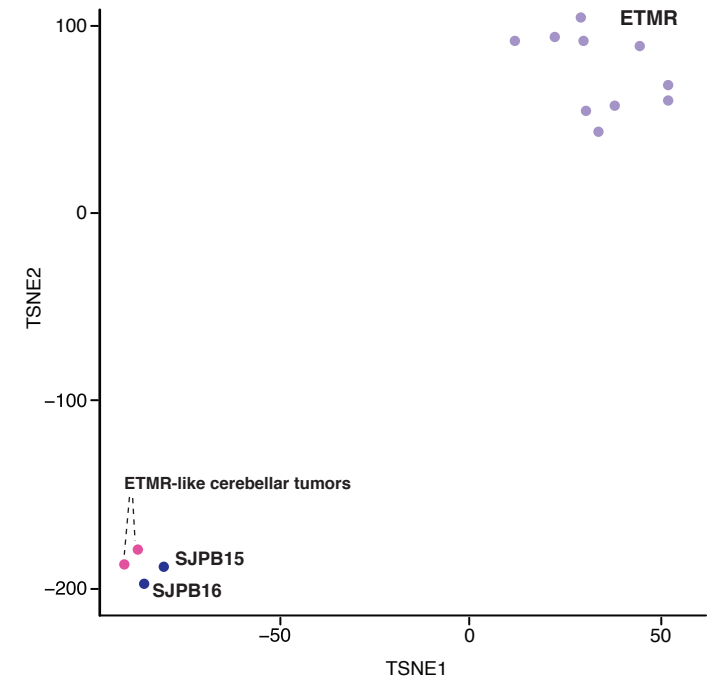

SJPB15 and SJPB16 (dark blue) clustered with two tumors designated “ETMR-like infantile cerebellar embryonal tumors” by Uro-Coste and colleagues (pink), but are less similar to ten C19MC-altered ETMR samples obtained in-house (purple). All four “ETMR-like” tumors are characterized by a lack of C19MC amplification, as well as presence of both nonsense and missense *DICER1* mutations.
