# Supplementary material
Source: PubMed Central journal article supplement (PMC7065912)

# SJPB17

Male, 14.4 years, M<sup>0</sup>, histology: pineoblastoma  
SJMB03 therapy (CSI)  
Alive without disease 10 years after Dx

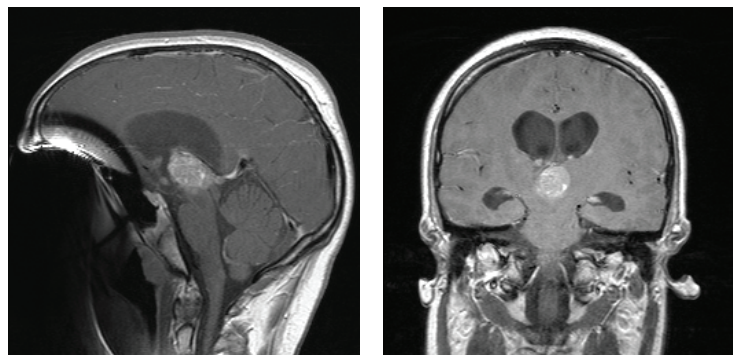

Methylation class (t-SNE): MB-WNT  
Methylation class (MNP): MB-WNT

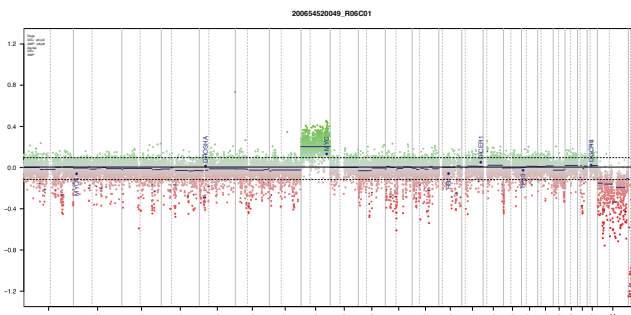

Tumor only WES:  
*CTNNB1* c.101G>T p.G34V

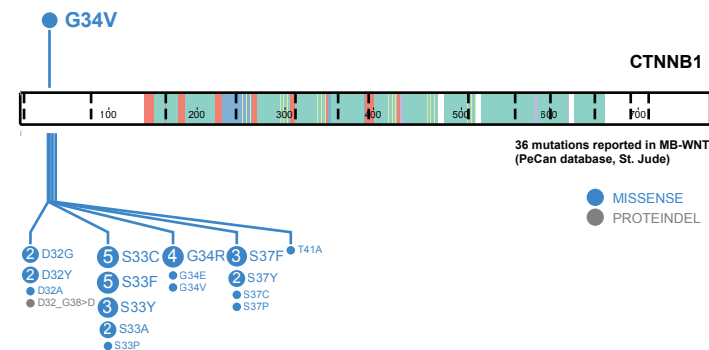

# SJPB19

Male, 1.85 years, M<sup>0</sup>, histology: pineoblastoma  
CDDP/CPM/VCR/VP16/IT mafosfamide, focal radiation  
Alive without disease 12.8 years from Dx

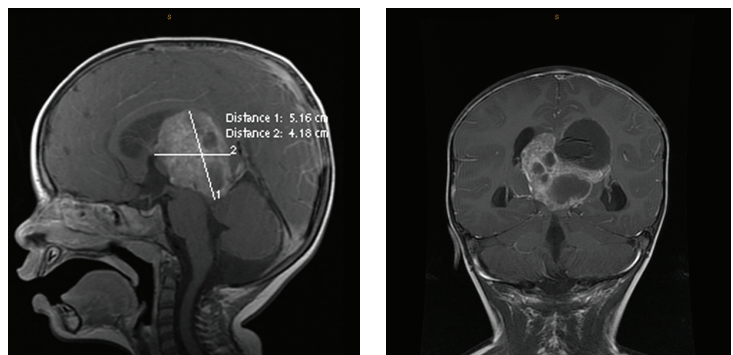

Methylation class (t-SNE): Close to control pineal tissue  
Methylation class (MNP): MB-G3

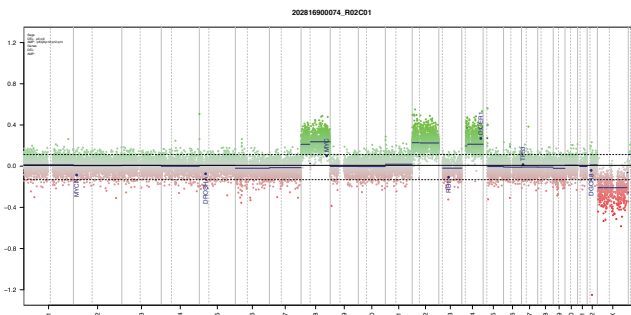

Tumor only WES:  
*CTNNB1* c.110C>T p.S37F

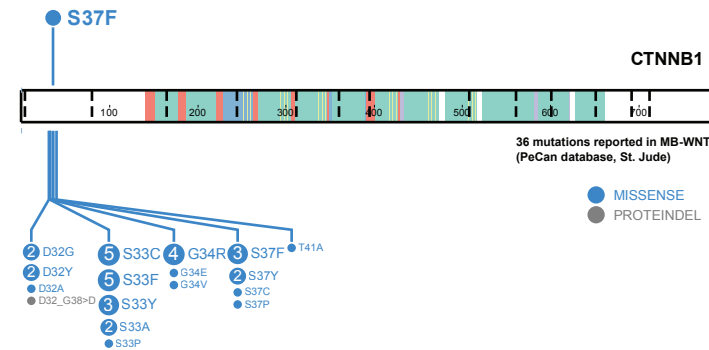

Supplement: NIHMS1068216-supplement-8.pdf [file NIHMS1068216-supplement-8.pdf]
