# Supplementary material
Source: PubMed Central journal article supplement (PMC7065912)
Supplement: NIHMS1068216-supplement-10.pdf [file NIHMS1068216-supplement-10.pdf]

| Patient no. | Age at Dx (years) | Sex | Histology           | Metastasis | Treatment                                                               | Methylation subgroup (Fig 2A) | Chromosomal CNAs                                            | Mutations                                            | Disease status | Duration of FU (years) |
|-------------|-------------------|-----|---------------------|------------|-------------------------------------------------------------------------|-------------------------------|-------------------------------------------------------------|------------------------------------------------------|----------------|------------------------|
| SJPB08      | 7.63              | F   | PPTID               | No         | CCE x 2 → GTR<br>CSI (23.4Gy) + tumor boost (total 54Gy)<br>CCV x 4     | PB-B                          | Loss: 11                                                    | NA                                                   | NED            | 4.03                   |
| SJPB14      | 14.80             | M   | PC                  | No         | GTR                                                                     | Control, pineal               | Copy number neutral<br>Gain: 8, 13q<br>Focal gain: 2p, 10q  | NA                                                   | NED            | 1.28                   |
| SJPB16      | 4.71              | M   | Pineal anlage tumor | No         | Bx → GTR<br>CSI (23.4Gy) + tumor boost (total 54Gy)<br>CCV x 4          | ETMR                          | Loss: 16q, 17p<br>Focal/subarm loss: 6q, 10q, 11p, 14q, 19p | Somatic <i>DICER1</i> mutations:<br>E1434fs + E1705K | DOD            | 1.32                   |
| SJPB50      | 7.21              | M   | PPTID               | No         | STR<br>Focal proton (54Gy)<br>Bx (residual > 1.5cm <sup>2</sup> )       | NA                            | NA                                                          | NA                                                   | SD             | 2.92                   |
| SJPB53      | 15.01             | F   | PPTID               | No         | CSI (36Gy) + tumor boost (total 55.8Gy)<br>CCV (per ACNS0332 stratum A) | NA                            | NA                                                          | NA                                                   | SD             | 3.28                   |
| SJPB54      | 16.19             | F   | PTPR                | No         | STR (residual > 1.5cm <sup>2</sup> )<br>Focal RT (54Gy)                 | NA                            | NA                                                          | NA                                                   | SD             | 2.23                   |

Bx, biopsy; CCE, carboplatin-cyclophosphamide-etoposide; CCV, cisplatin-cyclophosphamide-vincristine; CNAs, copy number alterations; CSI, craniospinal irradiation; DOD, died of disease; Dx, diagnosis; ETMR, embryonal tumor with multilayered rosettes; F, female; fs, frameshift; FU, follow-up; GTR, gross total resection; M, male; NA, data not available; NED, no evidence of disease; No., number; PB-B, pineoblastoma subgroup B; PC, pineocytoma, PPTID, pineal parenchymal tumor of intermediate differentiation; PTPR, papillary tumor of pineal region; RT, radiotherapy; STR, subtotal resection

### Supplementary Table S1 Clinical characteristics, treatment, outcome and molecular features of patients with non-pineoblastoma histologies
