# Supplementary material
Source: PubMed Central journal article supplement (PMC7065912)
Supplement: NIHMS1068216-supplement-11.pdf [file NIHMS1068216-supplement-11.pdf]

|                | SJMB03 and SJMB03-like non-protocol patients |           |           |                  |           |           |              | SJMB03 |           |           |              |           |           | SJYC07       |    |           |           |         |           |           |              |
|----------------|----------------------------------------------|-----------|-----------|------------------|-----------|-----------|--------------|--------|-----------|-----------|--------------|-----------|-----------|--------------|----|-----------|-----------|---------|-----------|-----------|--------------|
|                | N                                            | 2yPFS (%) | 5yPFS (%) | p-value          | 2yOS (%)  | 5yOS (%)  | p-value      | N      | 2yPFS (%) | 5yPFS (%) | p-value      | 2yOS (%)  | 5yOS (%)  | p-value      | N  | 1yPFS (%) | 2yPFS (%) | p-value | 1yOS (%)  | 2yOS (%)  | p-value      |
| All            | 42                                           | 82.6±6.0  | 74.6±7.0  | -                | 90.1±4.7  | 75.2±7.3  | -            | 30     | 79.3±7.5  | 72.4±8.3  | -            | 86.2±6.4  | 74.7±8.3  | -            | 12 | 25.0±12.5 | 8.3±8.0   | -       | 33.3±13.6 | 8.3±8.0   | -            |
| AR/IR          | 18                                           | 100       | 100       | <b>0.007</b>     | 100       | 100       | <b>0.014</b> | 11     | 100       | 100       | <b>0.037</b> | 100       | 100       | <b>0.056</b> | 7  | 42.9±18.7 | 14.3±13.2 | 0.375   | 57.1±18.7 | 14.3±13.2 | <b>0.040</b> |
| HR             | 24                                           | 69.6±9.6  | 56.5±10.3 |                  | 82.6±7.9  | 60.3±10.3 |              | 19     | 66.7±11.1 | 55.6±11.7 |              | 77.8±9.8  | 61.1±11.5 |              | 5  | 0         | 0         |         | 0         | 0         |              |
| M <sup>0</sup> | 24                                           | 100       | 100       | <b>&lt;0.001</b> | 100       | 100       | <b>0.001</b> | 16     | 100       | 100       | <b>0.004</b> | 100       | 100       | <b>0.006</b> | 7  | 42.9±18.7 | 14.3±13.2 | 0.375   | 57.1±18.7 | 14.3±13.2 | <b>0.040</b> |
| M <sup>+</sup> | 18                                           | 58.5±11.9 | 41.2±11.9 |                  | 76.5±10.3 | 45.8±12.4 |              | 14     | 53.8±13.8 | 38.5±13.5 |              | 69.2±12.8 | 46.2±13.8 |              | 5  | 0         | 0         |         | 0         | 0         |              |
| GTR            | 15                                           | 100       | 100       | <b>0.005</b>     | 100       | 100       | <b>0.008</b> | 8      | 100       | 100       | <b>0.028</b> | 100       | 100       | <b>0.032</b> | 5  | 20.0±17.9 | 0         | 0.114   | 20.0±17.9 | 0         | 0.114        |
| STR/Bx         | 27                                           | 73.1±8.7  | 61.5±9.5  |                  | 84.6±7.1  | 63.9±9.7  |              | 22     | 71.4±9.9  | 61.9±10.6 |              | 81.0±8.6  | 65.3±10.7 |              | 7  | 28.6±17.1 | 14.3±13.2 |         | 42.9±18.7 | 14.3±13.2 |              |
| R <sup>0</sup> | 22                                           | 95.2±5.7  | 84.7±8.2  | 0.129            | 95.2±4.7  | 89.6±7.0  | 0.229        | 13     | 92.3±7.4  | 84.6±10.0 | 0.275        | 92.3±7.4  | 92.3±7.4  | 0.355        | -  | -         | -         | -       | -         | -         | -            |
| R              | 20                                           | 68.4±10.7 | 63.2±11.1 |                  | 84.2±8.4  | 62.3±11.3 |              | 17     | 68.6±11.6 | 62.5±12.1 |              | 81.2±9.8  | 62.5±12.1 |              | -  | -         | -         | -       | -         | -         | -            |
| RT             | -                                            | -         | -         | -                | -         | -         | -            | -      | -         | -         | -            | -         | -         | -            | 6  | 50.0±20.4 | 16.7±15.2 | 0.148   | 66.7±19.2 | 16.7±15.2 | <b>0.007</b> |
| No RT          | -                                            | -         | -         | -                | -         | -         | -            | -      | -         | -         | -            | -         | -         | 6            | 0  | 0         |           | 0       | 0         |           |              |

Bx, biopsy; GTR, gross total resection; HR, high-risk; M<sup>0</sup>, non-metastatic; M<sup>+</sup>, metastatic; N, number; OS, overall survival; PFS, progression-free survival; R<sup>0</sup>, residual tumor ≤1.5cm<sup>2</sup>; R<sup>+</sup>, residual tumor >1.5cm<sup>2</sup>; RT, radiotherapy; STR, subtotal resection

**Supplementary Table S2** Progression-free survival (PFS) and overall survival (OS) of study patients
