# Supplementary material
Source: PubMed Central journal article supplement (PMC7065912)

# Supplementary Fig. S2

**a**

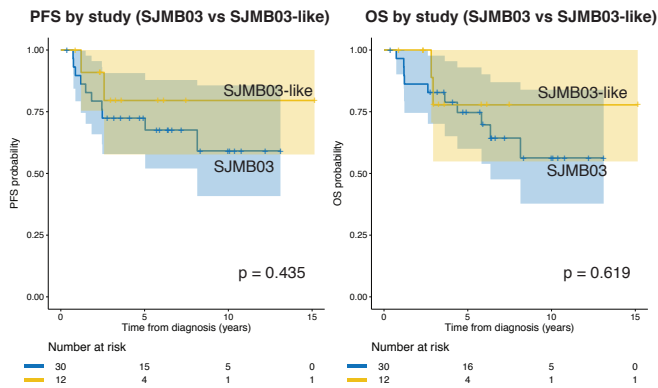

**b**

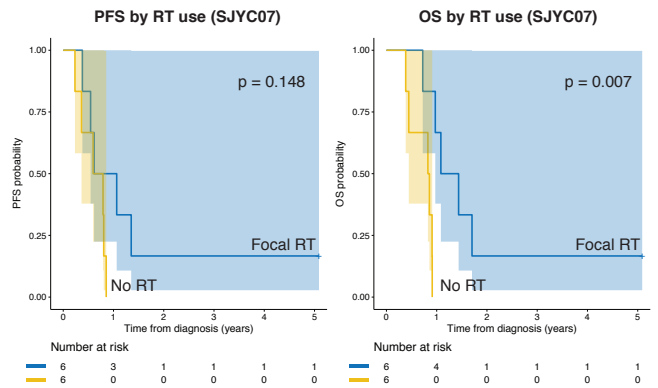

**c**

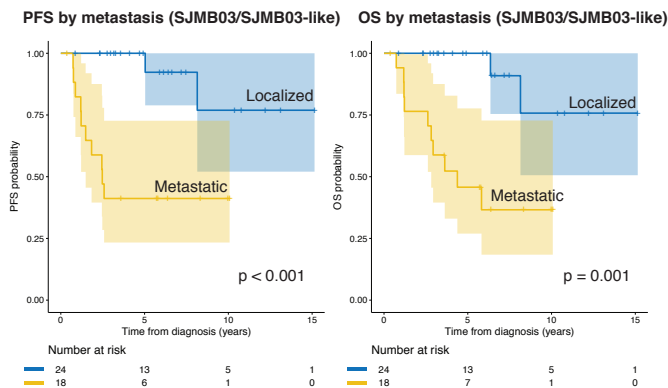

**d**

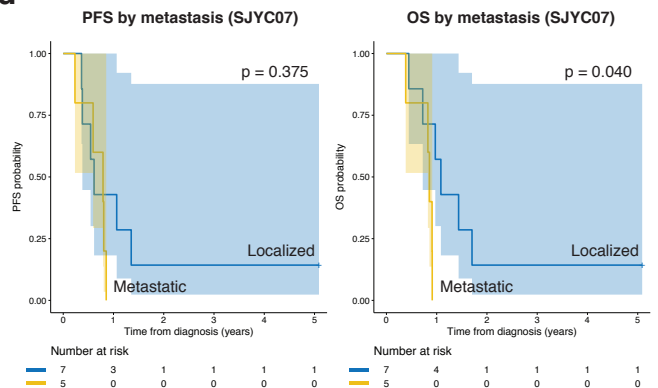

**e**

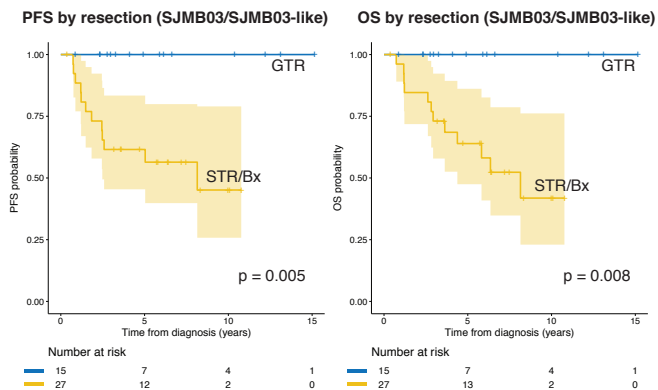

**f**

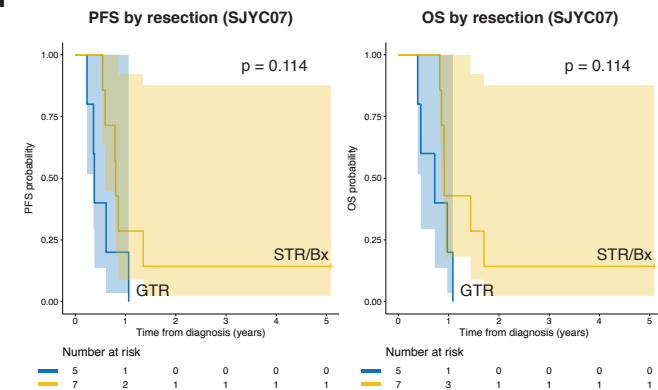

**g**

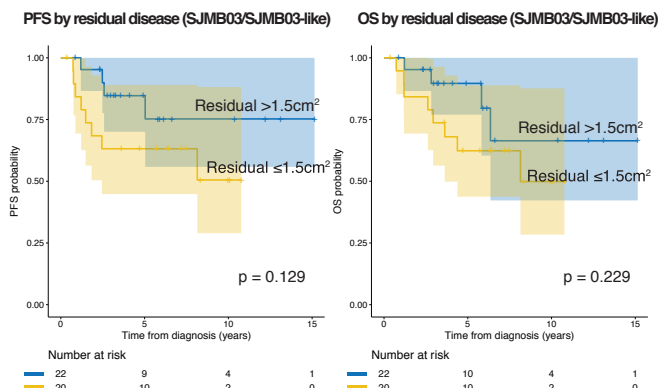

**h**

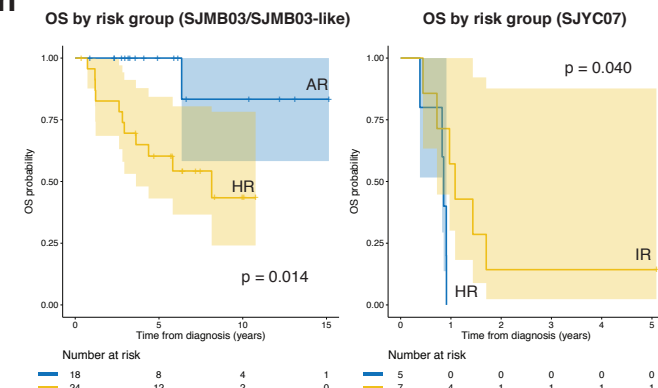

Supplement: NIHMS1068216-supplement-2.pdf [file NIHMS1068216-supplement-2.pdf]

a

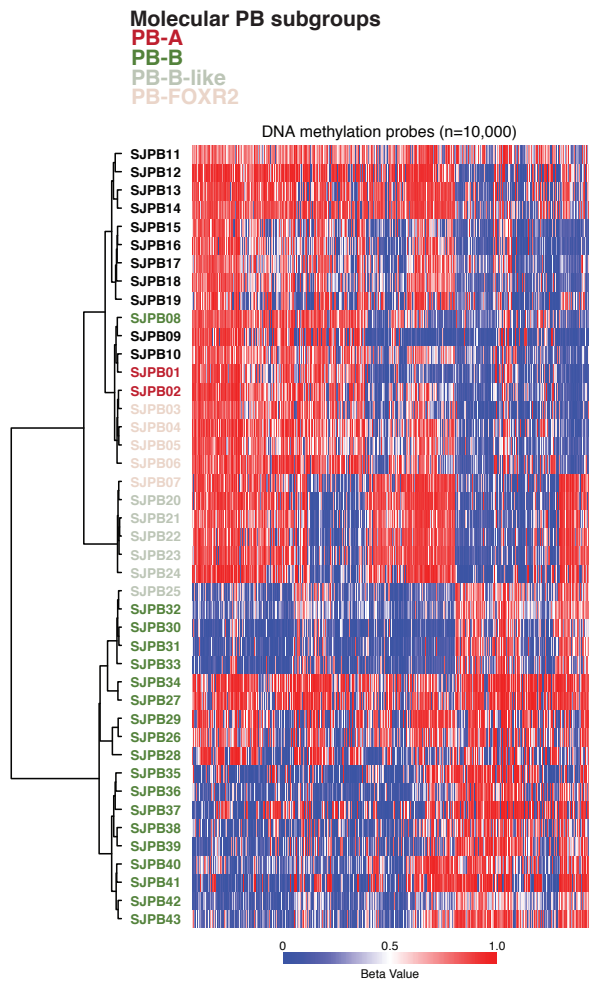

b

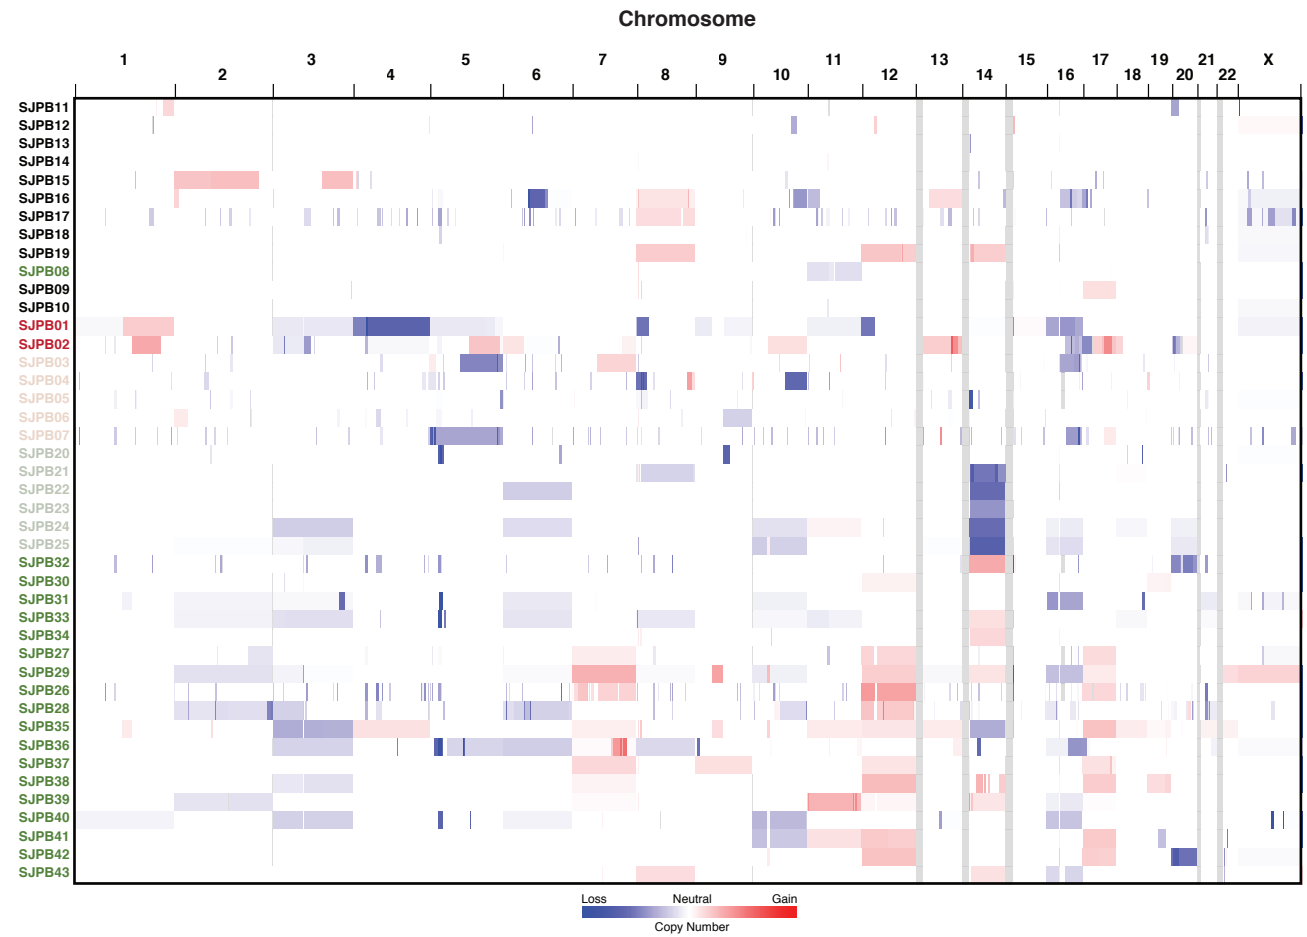

Supplement: NIHMS1068216-supplement-3.pdf [file NIHMS1068216-supplement-3.pdf]

Supplementary Fig. S4

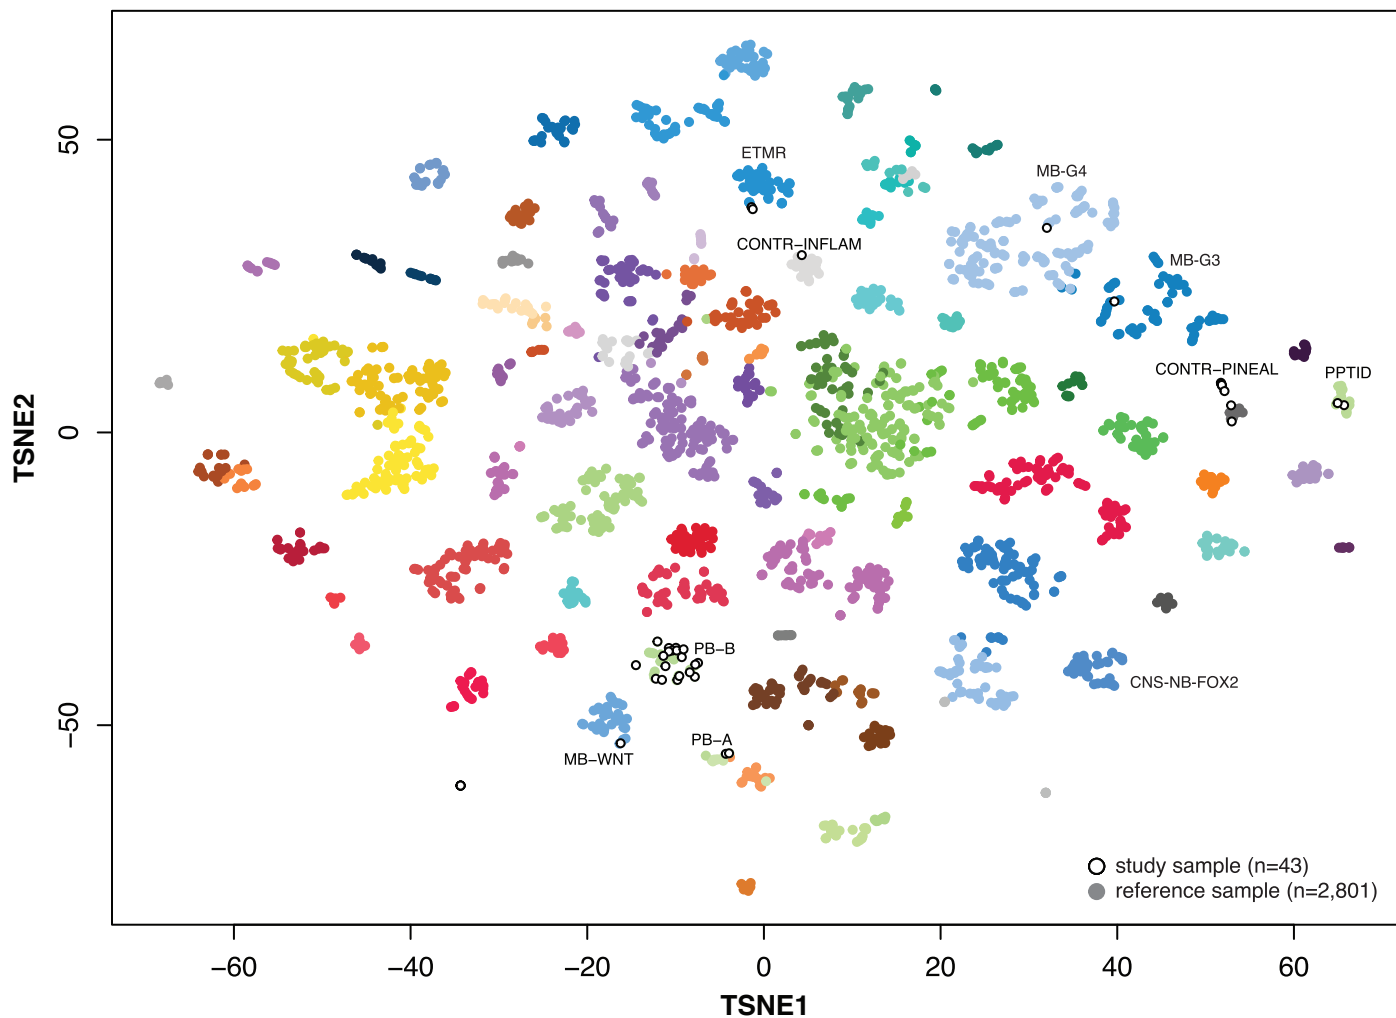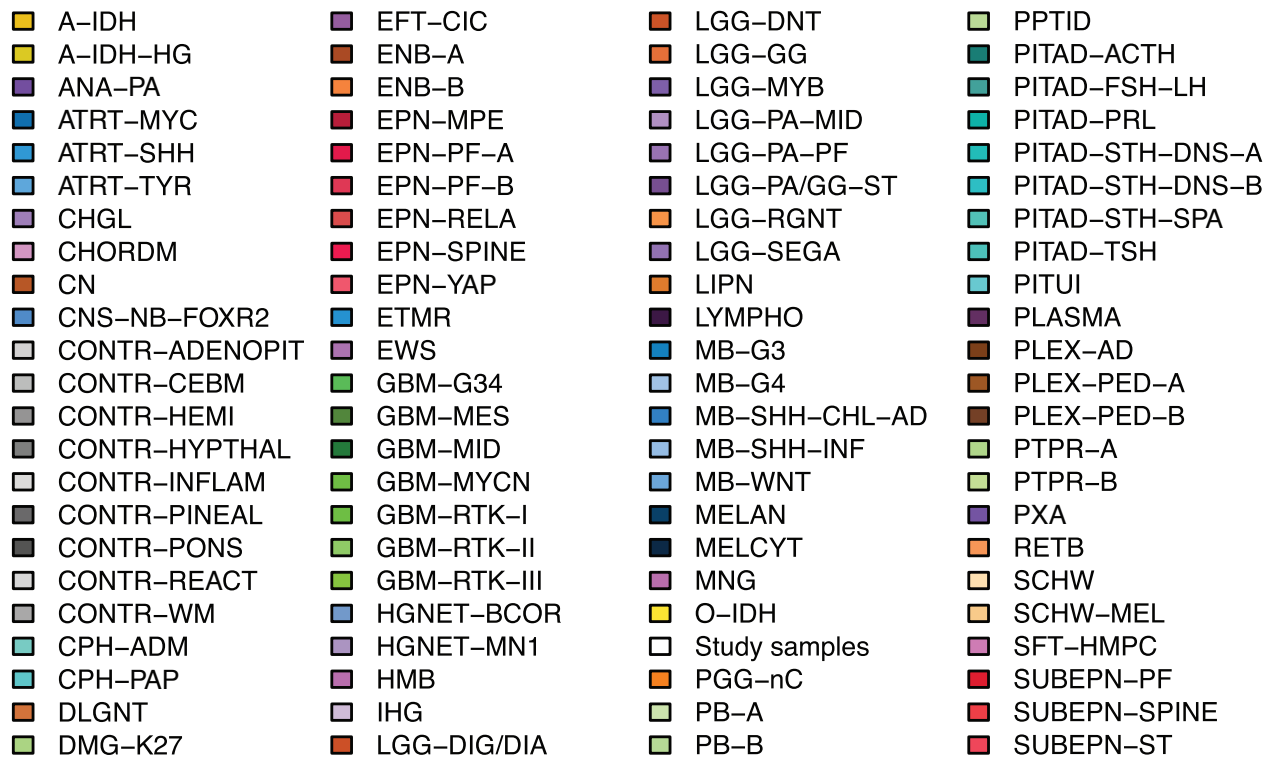

Supplement: NIHMS1068216-supplement-4.pdf [file NIHMS1068216-supplement-4.pdf]

## Top 200 Most Variable Genes

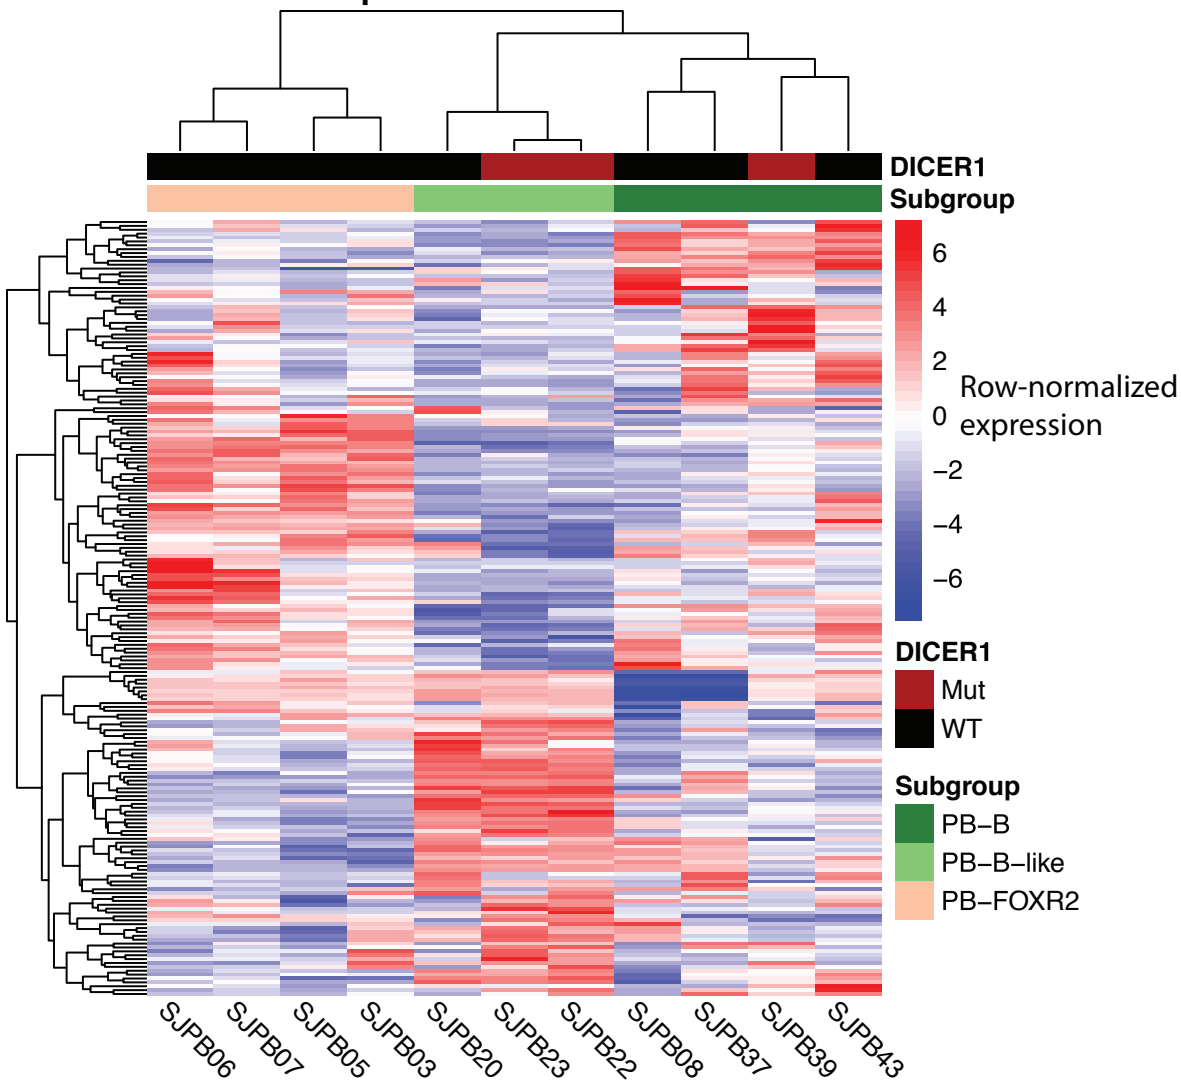

Supplement: NIHMS1068216-supplement-5.pdf [file NIHMS1068216-supplement-5.pdf]

Supplementary Fig. S6

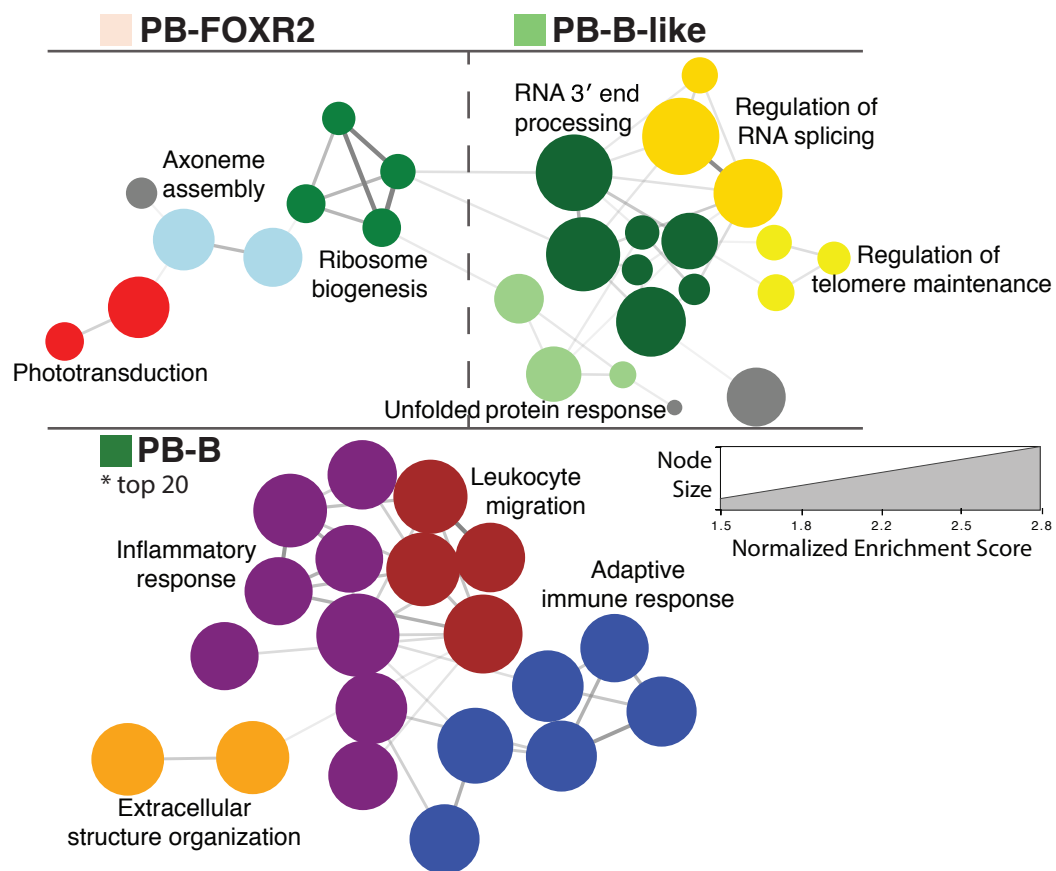

Supplement: NIHMS1068216-supplement-6.pdf [file NIHMS1068216-supplement-6.pdf]
